# Supplementary material for: Wound Healing in a Porcine Model of Retinal Holes
Source: PubMed Central journal article supplement — Invest Ophthalmol Vis Sci. 2024 Aug 26;65(10):35. doi: 10.1167/iovs.65.10.35 (PMC11361378; doi:10.1167/iovs.65.10.35), 2024-08-26
Supplement: iovs-65-10-35_s001.pdf [file iovs-65-10-35_s001.pdf]

**Supplementary Figure S1**

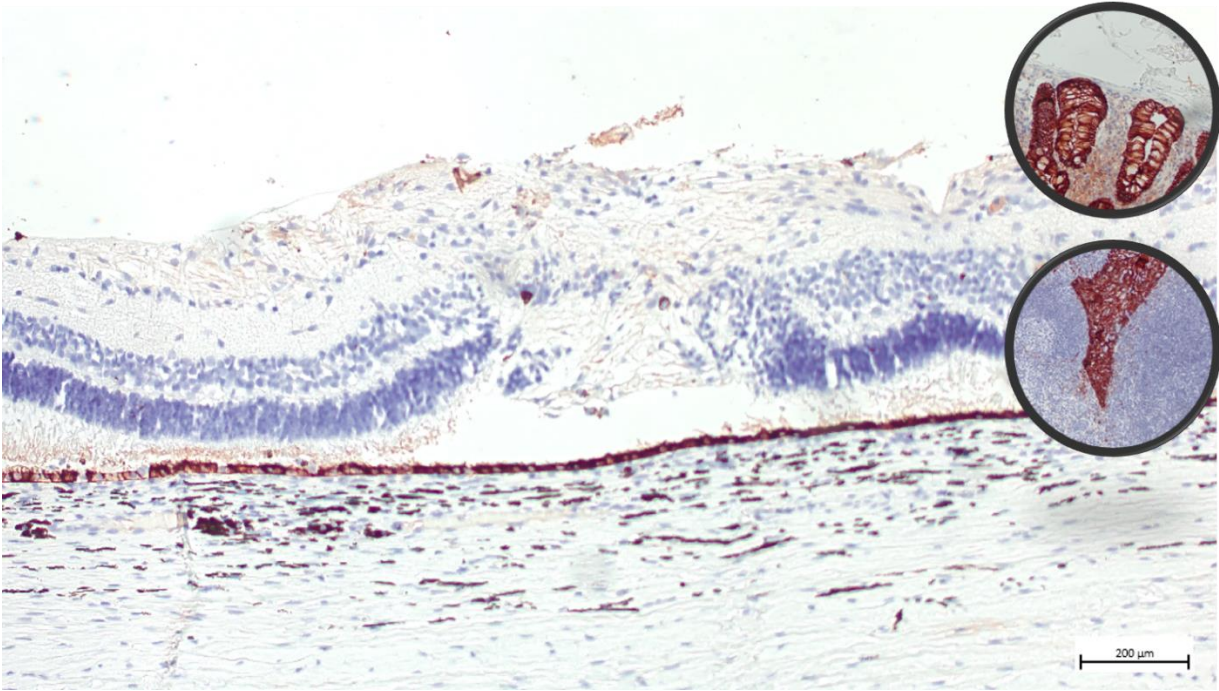

**S1. Immunohistochemical (IHC) staining of a spontaneous closed retinal hole using a neuroepithelial antibody.** IHC shows that the retinal plug does not contain cells positive for anti-cytokeratin (CK-AECAM), representing RPE cells. The positive controls, shown on the right, include gut and lymphoma tissue.
